# Supplementary material for: SLTAB2 is the paramutated SULFUREA locus in tomato
Source: PubMed Central journal article supplement (PMC4861014; doi:10.1093/jxb/erw096), 2016-03-08
Supplement: supp_erw096_supplementary_tables_S1_S5.pdf [file supp_erw096_supplementary_tables_S1_S5.pdf]

Supplementary table 1: summary of RNA-Seq alignments.

| library         | alignment rate | # read pairs mapped |
|-----------------|----------------|---------------------|
| wt 1            | 73.2%          | 22843633            |
| wt 2            | 67.8%          | 29047268            |
| <i>sulf</i> 1   | 68.1%          | 12503876            |
| <i>sulf</i> + 1 | 66.4%          | 11706233            |
| <i>sulf</i> 2   | 69.5%          | 12336371            |
| <i>sulf</i> + 2 | 69.4%          | 12165523            |
| <i>sulf</i> 3   | 71.8%          | 17220956            |
| <i>sulf</i> + 3 | 67.1%          | 10809351            |

Supplementary table 2: summary of sRNA-Seq alignments.

| library         | # reads mapped |
|-----------------|----------------|
| wt 1            | 15706743       |
| wt 2            | 18315830       |
| <i>sulf</i> 1   | 19570113       |
| <i>sulf</i> + 1 | 18922877       |
| <i>sulf</i> 2   | 13778995       |
| <i>sulf</i> + 2 | 18009323       |

Supplementary table 3: summary of whole-genome bisulfite sequencing (WGBS) alignments, after deduplication.

| library       | # mapped pairs | # read1 mapped in SE | coverage |
|---------------|----------------|----------------------|----------|
| wt 1          | 12786917       | 7138458              | 4.8x     |
| wt 2          | 14005678       | 8596462              | 5.4x     |
| <i>sulf</i> 1 | 14778533       | 6474490              | 5.3x     |
| <i>sulf</i> 2 | 18766251       | 6211632              | 6.4x     |

Supplementary table 4: Oligonucleotides used in the present study.

| Experiment   | Name      | Sequence (5'-3')                |
|--------------|-----------|---------------------------------|
| qPCR         | sltab2 fw | CCTGAGAGCTTATCTGAGTGGG          |
|              | sltab2 rv | ACAAGTGATAAGCACCGTTTGC          |
|              | tip41 fw  | ATGGAGTTTTTGAGCTTCTGC           |
|              | tip41 rv  | GCTGCGTTTCTGGCTTAG              |
|              | expr fw   | GCTAAGAACGCTGGACCTAAT           |
|              | expr rv   | TGGGTGTGCCTTTCTGAATG            |
| VIGS cloning | DMR1a fw  | CCGGTACCGTCGTGGGTGCTCACTTCTTT   |
|              | DMR1a rv  | CCCTCGAGAGCTTATCTGAGTGGGAATTGGA |
|              | DMR1b fw  | CCGGTACCTGAAGAGAGAGGGAATCATCACA |

|             |            |                                |
|-------------|------------|--------------------------------|
|             | DMR1b rv   | CCCTCGAGTGTTGAATTGGGCAAAGGACAA |
| McrBC assay | sltab2M fw | TCTCCAACATTTGAGGGTCGTG         |
|             | sltab2M rv | CCTGAGAGCTTATCTGAGTGGG         |
| Bisulfite   | DMR1 fw    | GGATTGAAATGTTGTATATATAGGG      |
|             | DMR1 rv    | CTTCTARTCTCCCTTATCTTTTAAA      |

Supplementary table 5: summary of down-regulated genes in the genetically defined region of *SULFUREA*. Chromosome position (start and end), basal level of expression (baseMean), log2 fold-change between wt and sulf, adjusted p-value (padj). CG, CHG and CHH DMRs indicate whether there was a differentially methylated region in the relevant context assigned to the gene (each DMR was assigned to the nearest gene). For the CHH DMRs, their distance to the gene is also reported.

| gene             | chromosome | start    | end      | baseMean | log2FC(wt/sulf) | padj      | CG DMR | CHG DMR | CHH DMR    | distance (CHH) | annotation                                                      |
|------------------|------------|----------|----------|----------|-----------------|-----------|--------|---------|------------|----------------|-----------------------------------------------------------------|
| Solyc02g005200.2 | SL2.50ch02 | 7263948  | 7267830  | 183.41   | 4.48            | 3.52E-013 | hyper  | -       | hyper/hypo | 0              | SLTAB2, PsaB translation factor                                 |
| Solyc02g021440.2 | SL2.50ch02 | 22714574 | 22721523 | 236.35   | 1.58            | 3.56E-005 | -      | -       | hyper      | <1kb           | serine threonine kinase                                         |
| Solyc02g037530.2 | SL2.50ch02 | 31048794 | 31059050 | 236.81   | 1.22            | 2.25E-003 | -      | -       | hyper      | 1-2kb          | auxin response factor 8B                                        |
| Solyc02g037550.2 | SL2.50ch02 | 31094995 | 31098669 | 142.74   | 3.34            | 2.28E-003 | -      | -       | hyper      | 3-4kb          | Auxin efflux carrier family protein                             |
| Solyc02g061990.2 | SL2.50ch02 | 33560595 | 33561944 | 24.70    | 3.29            | 3.16E-003 | -      | -       | hyper      | 5-6kb          | Basic leucine zipper transcription factor                       |
| Solyc02g062330.1 | SL2.50ch02 | 33942894 | 33947887 | 16.65    | 2.39            | 8.33E-003 | -      | -       | hyper      | <1kb           | Kinesin like protein                                            |
| Solyc02g063030.2 | SL2.50ch02 | 35047619 | 35051492 | 1622.94  | 1.35            | 6.52E-004 | -      | -       | hyper      | <1kb           | LuxR family transcriptional regulator                           |
| Solyc02g063450.2 | SL2.50ch02 | 35542967 | 35548538 | 716.36   | 3.03            | 2.79E-005 | -      | -       | -          | -              | Hypothetical YFW family protein 5                               |
| Solyc02g064720.2 | SL2.50ch02 | 35825774 | 35829784 | 126.50   | 1.13            | 3.25E-002 | -      | -       | -          | -              | Phototropic-responsive NPH3 family protein                      |
| Solyc02g064990.2 | SL2.50ch02 | 36118886 | 36121206 | 24.76    | 2.39            | 1.41E-003 | -      | -       | hyper      | 3-4kb          | remorin, plant-specific marker for membrane                     |
| Solyc02g065000.1 | SL2.50ch02 | 36129001 | 36129522 | 237.91   | 2.50            | 2.12E-005 | -      | -       | hyper      | <1kb           | Calmodulin-like protein                                         |
| Solyc02g065190.2 | SL2.50ch02 | 36351922 | 36354372 | 40.03    | 4.57            | 5.92E-007 | -      | -       | hyper      | 1-2kb          | Cytochrome P450                                                 |
| Solyc02g065230.2 | SL2.50ch02 | 36403136 | 36404871 | 64.18    | 2.17            | 4.88E-003 | -      | -       | hyper      | 2-3kb          | Cytochrome P450                                                 |
| Solyc02g065400.2 | SL2.50ch02 | 36573934 | 36576914 | 43311.91 | 0.87            | 1.06E-002 | -      | -       | -          | -              | Oxygen-evolving enhancer protein 1 of photosystem II            |
| Solyc02g065610.2 | SL2.50ch02 | 36775106 | 36779309 | 311.99   | 1.02            | 2.02E-002 | -      | -       | hyper      | 0              | Leaf senescence protein-like                                    |
| Solyc02g067690.2 | SL2.50ch02 | 37817307 | 37819014 | 61.82    | 1.66            | 9.46E-003 | -      | -       | hyper      | <1kb           | Glucosyltransferase-like protein                                |
| Solyc02g067730.1 | SL2.50ch02 | 37846237 | 37848096 | 12.94    | 3.93            | 1.57E-004 | -      | -       | hyper      | 2-3kb          | RNA exonuclease 4                                               |
| Solyc02g068740.2 | SL2.50ch02 | 38671673 | 38675621 | 222.70   | 1.47            | 1.09E-004 | -      | -       | hyper      | 1-2kb          | Glycine cleavage system H protein 1                             |
| Solyc02g068900.2 | SL2.50ch02 | 38779435 | 38783709 | 499.63   | 1.59            | 2.01E-002 | -      | -       | -          | -              | Glutathione transferase                                         |
| Solyc02g069060.2 | SL2.50ch02 | 39033490 | 39034511 | 55.59    | 2.33            | 1.09E-002 | -      | -       | -          | -              | Phloem lectin                                                   |
| Solyc02g069450.2 | SL2.50ch02 | 39337837 | 39341402 | 47270.82 | 1.40            | 1.72E-003 | -      | -       | -          | -              | Photosystem I reaction center subunit III                       |
| Solyc02g069460.2 | SL2.50ch02 | 39339989 | 39341652 | 37771.88 | 1.45            | 1.13E-003 | -      | -       | -          | -              | Photosystem I reaction center subunit III                       |
| Solyc02g069490.2 | SL2.50ch02 | 39357631 | 39359749 | 14018.31 | 2.91            | 1.51E-015 | -      | -       | -          | -              | FAD linked oxidase domain protein                               |
| Solyc02g069860.2 | SL2.50ch02 | 39676145 | 39682167 | 2174.91  | 0.70            | 1.44E-002 | -      | -       | -          | -              | Nuclear transcription factor Y subunit A-7                      |
| Solyc02g070430.2 | SL2.50ch02 | 40156961 | 40159000 | 11.06    | 2.85            | 1.86E-002 | -      | -       | hyper      | <1kb           | Gibberellin 2-oxidase 1                                         |
| Solyc02g070440.2 | SL2.50ch02 | 40174602 | 40181876 | 441.00   | 1.30            | 1.44E-004 | -      | -       | hyper      | 5-6kb          | Katanin p60 ATPase-containing subunit A                         |
| Solyc02g070530.2 | SL2.50ch02 | 40261306 | 40264437 | 175.13   | 0.99            | 1.76E-002 | -      | -       | hyper      | 3-4kb          | Potassium channel                                               |
| Solyc02g070880.1 | SL2.50ch02 | 40480871 | 40481611 | 66.47    | 1.51            | 8.33E-003 | -      | -       | hyper      | 2-3kb          | BHLH1 transcription factor                                      |
| Solyc02g070950.1 | SL2.50ch02 | 40505514 | 40506311 | 8312.01  | 2.79            | 1.93E-008 | -      | -       | -          | -              | Chlorophyll a/b binding protein                                 |
| Solyc02g070970.1 | SL2.50ch02 | 40512599 | 40513396 | 8396.36  | 2.15            | 1.19E-006 | -      | -       | -          | -              | Chlorophyll a/b binding protein                                 |
| Solyc02g070980.1 | SL2.50ch02 | 40515041 | 40515838 | 5900.04  | 2.84            | 4.50E-007 | -      | -       | -          | -              | Chlorophyll a/b binding protein                                 |
| Solyc02g070990.1 | SL2.50ch02 | 40517380 | 40518177 | 7248.88  | 2.70            | 2.55E-007 | -      | -       | -          | -              | Chlorophyll a/b binding protein                                 |
| Solyc02g071000.1 | SL2.50ch02 | 40519780 | 40520577 | 7535.60  | 3.33            | 3.32E-016 | -      | -       | -          | -              | Chlorophyll a/b binding protein                                 |
| Solyc02g071010.1 | SL2.50ch02 | 40522221 | 40523018 | 27284.50 | 1.34            | 3.19E-003 | -      | -       | -          | -              | Chlorophyll a/b binding protein                                 |
| Solyc02g071030.1 | SL2.50ch02 | 40525967 | 40526764 | 20104.76 | 0.96            | 3.02E-002 | -      | -       | -          | -              | Chlorophyll a/b binding protein                                 |
| Solyc02g071080.1 | SL2.50ch02 | 40573395 | 40574144 | 39.78    | 3.21            | 1.19E-006 | -      | -       | -          | -              | serine-type endopeptidase activity                              |
| Solyc02g071090.2 | SL2.50ch02 | 40577052 | 40579474 | 24.11    | 3.90            | 5.47E-006 | -      | -       | -          | -              | alpha,alpha-trehalose-phosphate synthase (UDP-forming) activity |
| Solyc02g071580.2 | SL2.50ch02 | 40975969 | 40981431 | 795.76   | 1.18            | 1.28E-002 | -      | -       | -          | -              | serine-type endopeptidase activity                              |
| Solyc02g071700.2 | SL2.50ch02 | 41066412 | 41069631 | 75.48    | 2.49            | 1.16E-004 | -      | -       | -          | -              | hydrolase activity, acting on ester bonds                       |
| Solyc02g071730.2 | SL2.50ch02 | 41094016 | 41099470 | 11.55    | 2.21            | 3.24E-002 | -      | -       | -          | -              | AG1, Floral homeotic protein AGAMOUS                            |
| Solyc02g071750.2 | SL2.50ch02 | 41119917 | 41124298 | 35.79    | 1.82            | 1.57E-002 | -      | -       | -          | -              | cyclic-nucleotide phosphodiesterase activity                    |
| Solyc02g072300.2 | SL2.50ch02 | 41586883 | 41593725 | 1135.94  | 0.80            | 4.70E-003 | -      | -       | hyper      | 3-4kb          | protein serine/threonine kinase activity                        |
| Solyc02g072530.1 | SL2.50ch02 | 41719617 | 41721053 | 526.53   | 1.15            | 2.91E-002 | -      | -       | -          | -              | protein serine/threonine kinase activity                        |
| Solyc02g076690.2 | SL2.50ch02 | 41833256 | 41835924 | 103.79   | 1.70            | 8.85E-004 | -      | -       | hyper      | 2kb            | cysteine-type peptidase activity                                |
| Solyc02g077100.2 | SL2.50ch02 | 42161703 | 42163579 | 209.03   | 1.24            | 4.99E-002 | -      | -       | hyper      | 4-5kb          | triglyceride lipase activity                                    |
| Solyc02g077110.2 | SL2.50ch02 | 42169831 | 42171393 | 212.84   | 1.37            | 9.32E-003 | -      | -       | hyper      | <1kb           | triglyceride lipase activity                                    |
| Solyc02g077160.2 | SL2.50ch02 | 42187913 | 42189472 | 262.44   | 1.40            | 1.36E-003 | -      | -       | -          | -              | triglyceride lipase activity                                    |
